# Supplementary material for: Integrated genome-wide chromatin occupancy and expression analyses identify key myeloid pro-differentiation transcription factors repressed by Myb
Source: PubMed Central journal article supplement — Nucleic Acids Res. 2011 Feb 11;39(11):4664–79. doi: 10.1093/nar/gkr024 (PMC3113568; doi:10.1093/nar/gkr024), 2011-02-11
Supplement: supp_gkr024_Supplementary_data_NAR-02589-V-2010.pdf [file supp_gkr024_Supplementary_data_NAR-02589-V-2010.pdf]

# Supplementary Figures

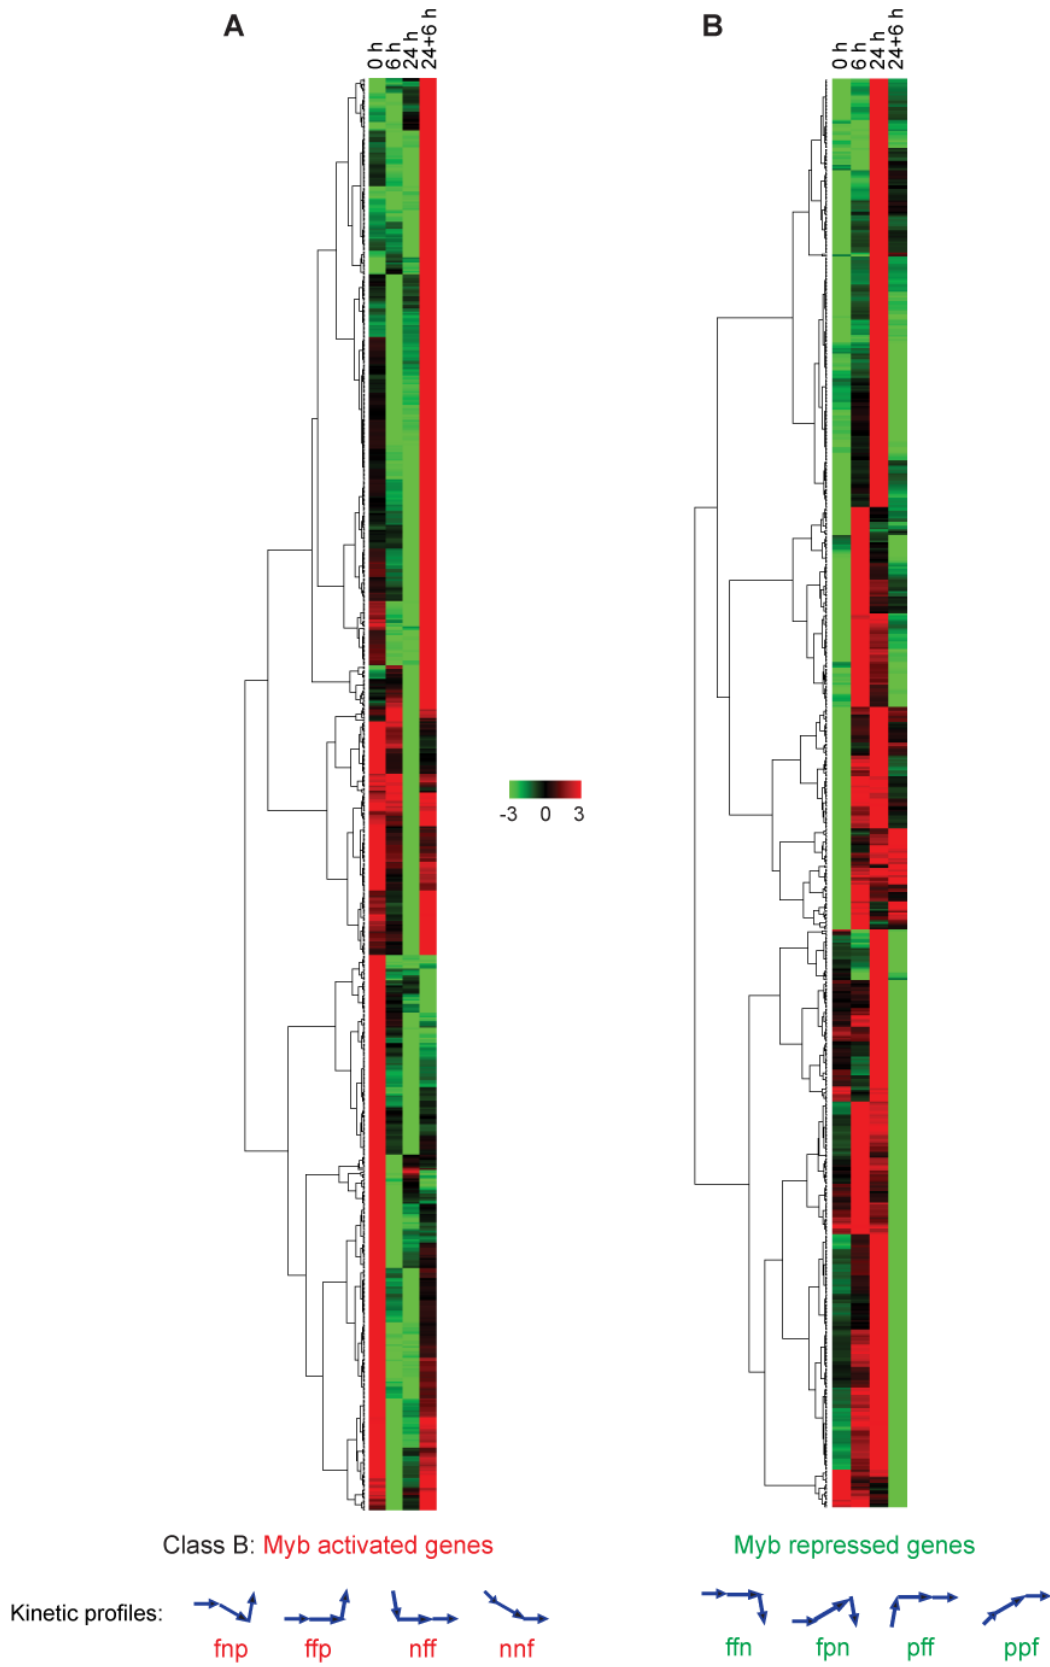

**Supplementary Figure S1. Hierarchical clustering of normalized expression levels of class B Myb regulated genes.**

The heatmap of relative log<sub>2</sub>-transformed expression levels of 846 Myb-activated and 764 -repressed genes during the  $\beta$ -E2 withdrawal and re-addition time course is shown. Each row represents a gene. Simplified arrow diagrams of corresponding kinetic profiles for Myb-activated and -repressed genes are also shown.

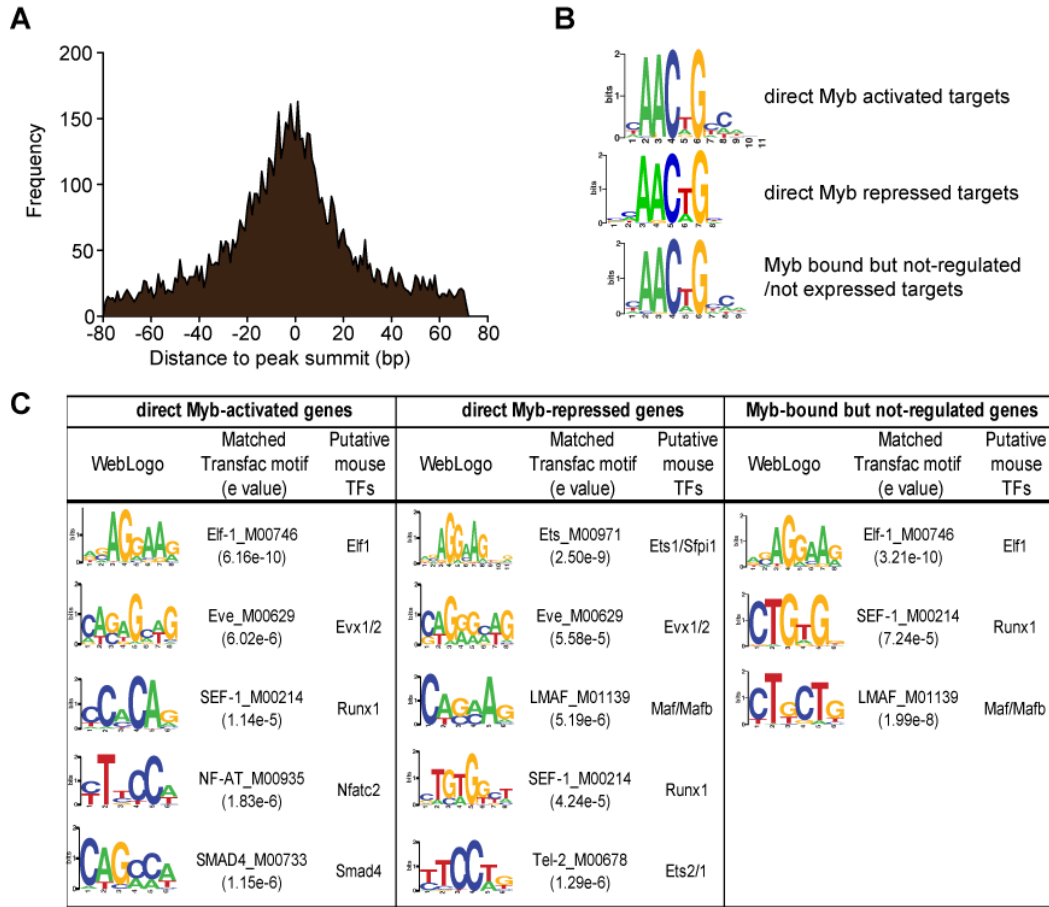

**Supplementary Figure S2. Overrepresented sequence motifs in MBRs.**

(A) Frequency of Myb binding motifs according to their distance to peak summits. (B) Myb binding motifs associated with Myb activated or repressed genes showed small differences in sequences flanking the “AACNG” core consensus binding sequences. (C) Overrepresented binding motifs for other transcription factors of Myb activated, repressed or bound but not regulated or not expressed genes.

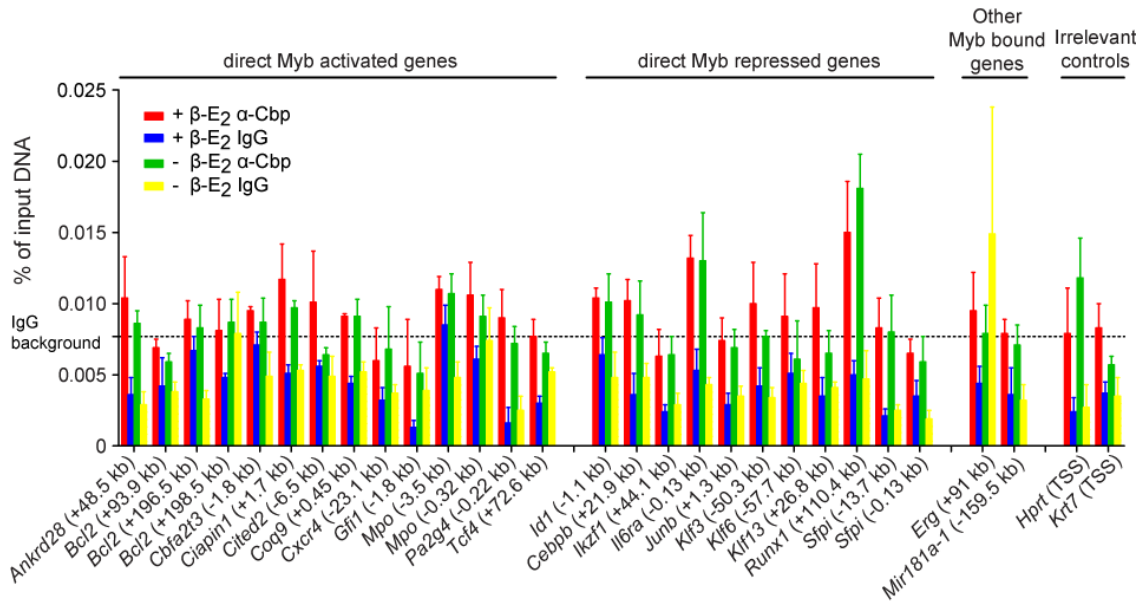

**Supplementary Figure S3. Limited Cbp occupancy was detected at a set of validated MBRs *in vivo*.**

Data are presented as mean  $\pm$  SD. IgG background represents the (mean + 1.64SD) of IgG signals across all regions. Cbp signals were similar to IgG background signals at most MBRs. Moreover, the signals showed no consistent changes with Myb occupancy when  $\beta$ -E<sub>2</sub> was withdrawn. \* denotes significant difference in Cbp occupancy when  $\beta$ -E<sub>2</sub> was withdrawn (Student's t test,  $P < 0.05$ ).

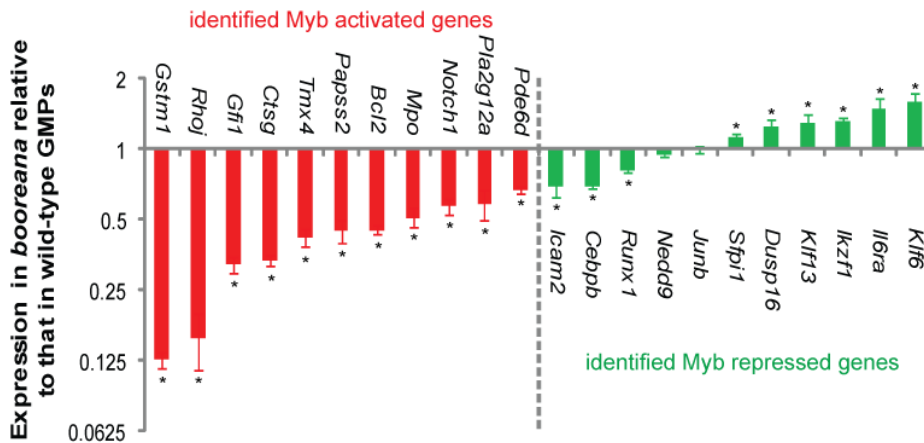

**Supplementary Figure S4. p300 is required for Myb's regulation of its activated genes and some of the repressed genes in GMPs.**

The expression of a set of 11 identified Myb-activated and 11 Myb-repressed target genes were measured in GMPs isolated from either wild-type or *booreana* mice using TaqMan assays. Data are normalized to *Hprt1* and presented as mean  $\pm$  SD. \* denotes significant difference between the wild-type and Booreana mice (Student's t test,  $P < 0.05$ ).

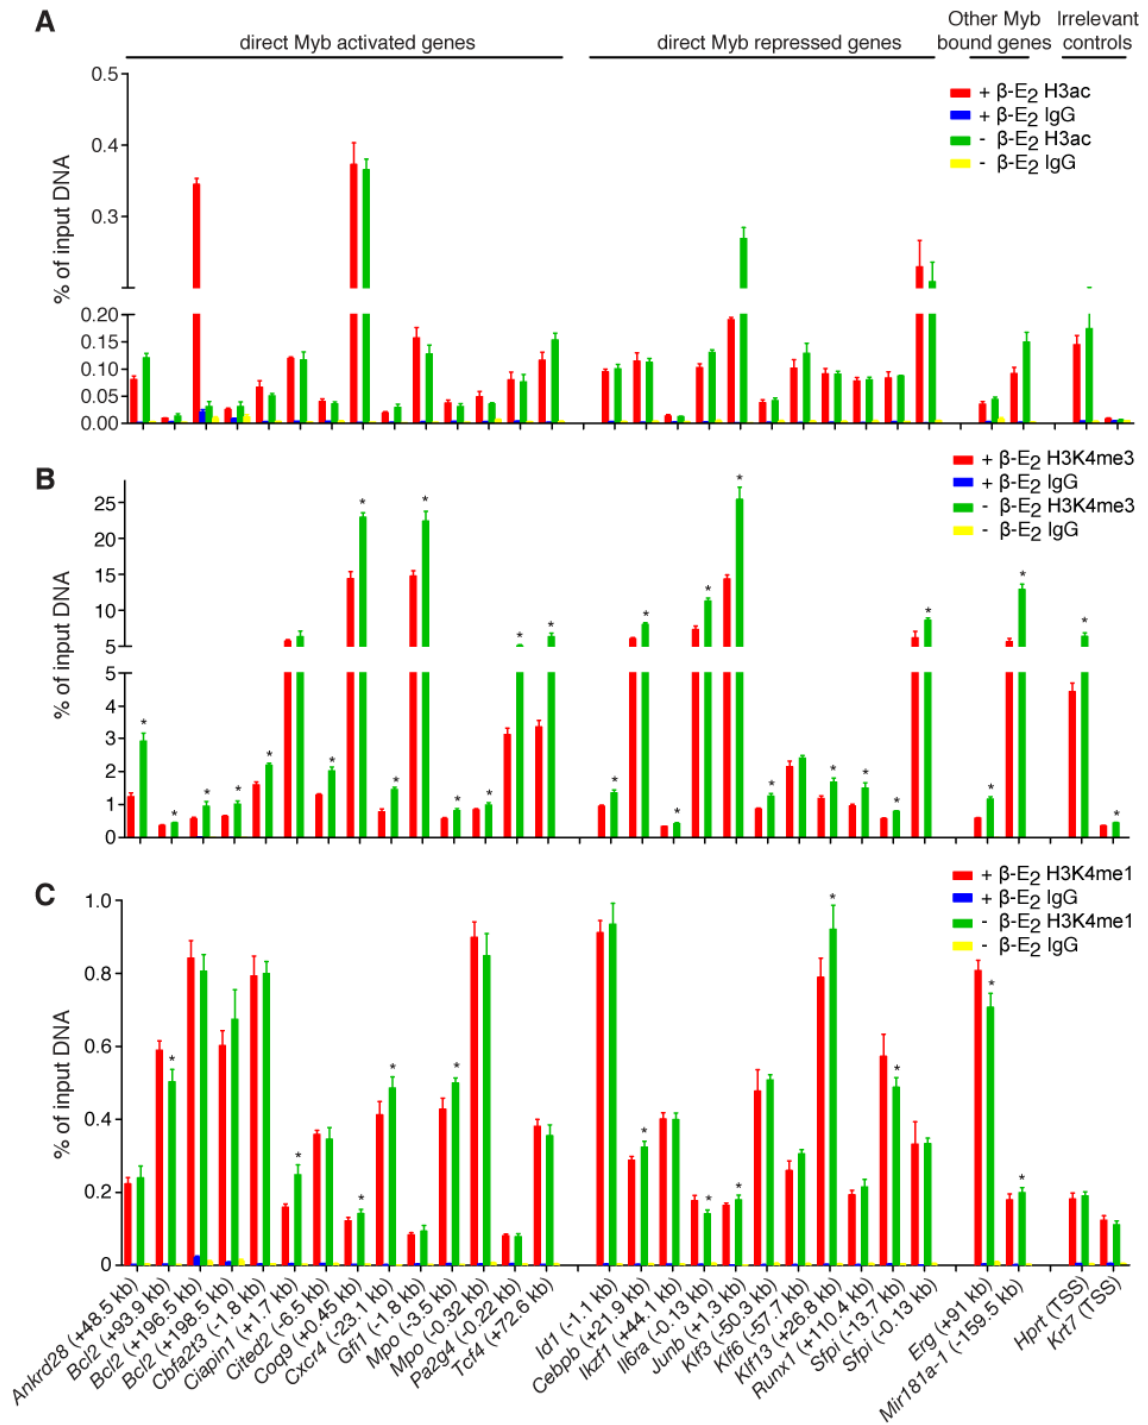

Supplementary Figure S5. (Continued on next page)

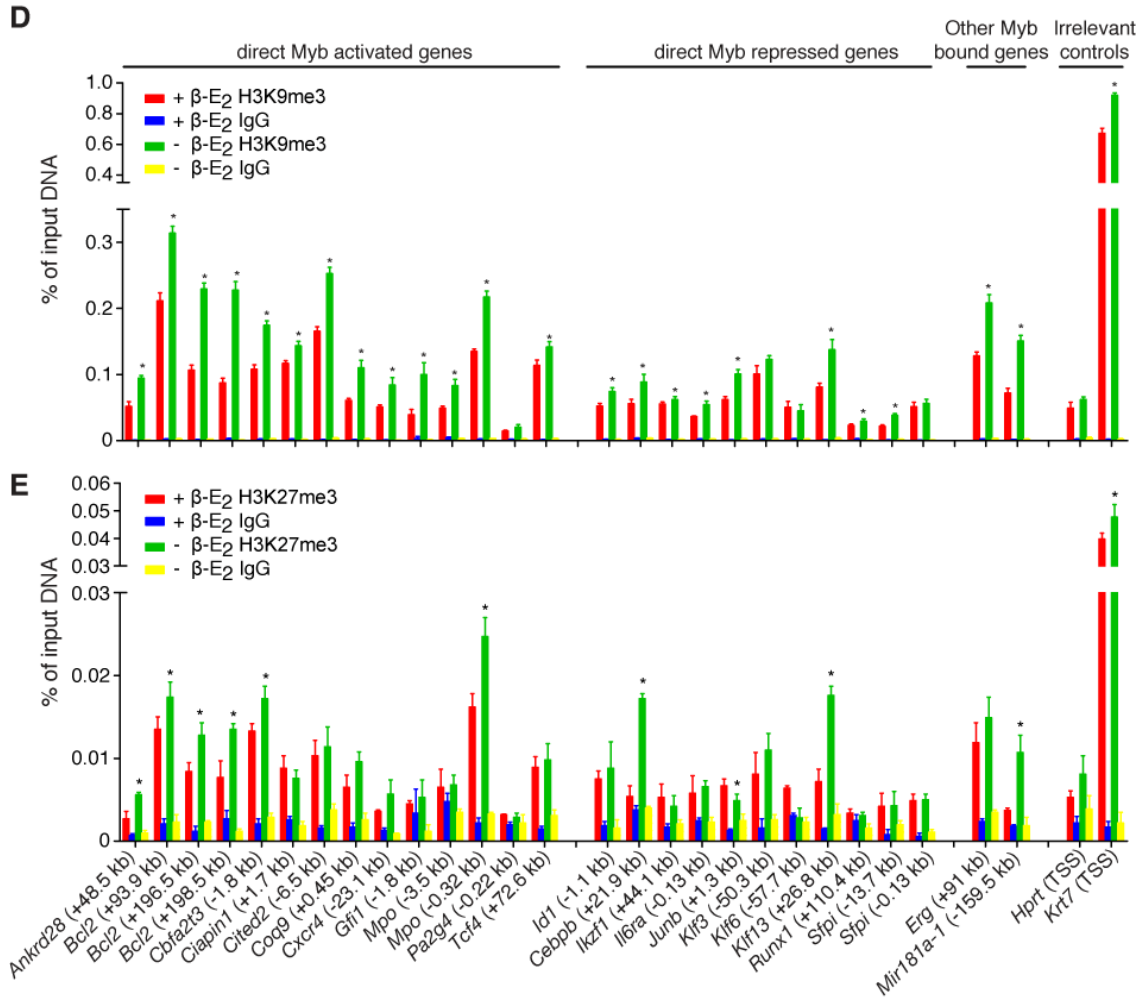

**Supplementary Figure S5. Myb modulated histone modifications.**

Levels of active histone marks H3ac (A), H3K4me3 (B), and H3K3me1 (C), and repressive histone marks H3K9me3 (D) and H3K27me3 (E) at our set of validated MBRs, were measured, when Myb was activated in the presence of  $\beta$ -E<sub>2</sub> and when Myb was inactivated by  $\beta$ -E<sub>2</sub> withdrawal for 6 h. Data are presented as mean  $\pm$  SD. \* denotes significant changes upon  $\beta$ -E<sub>2</sub> withdrawal (Student's t test,  $P < 0.05$ ).

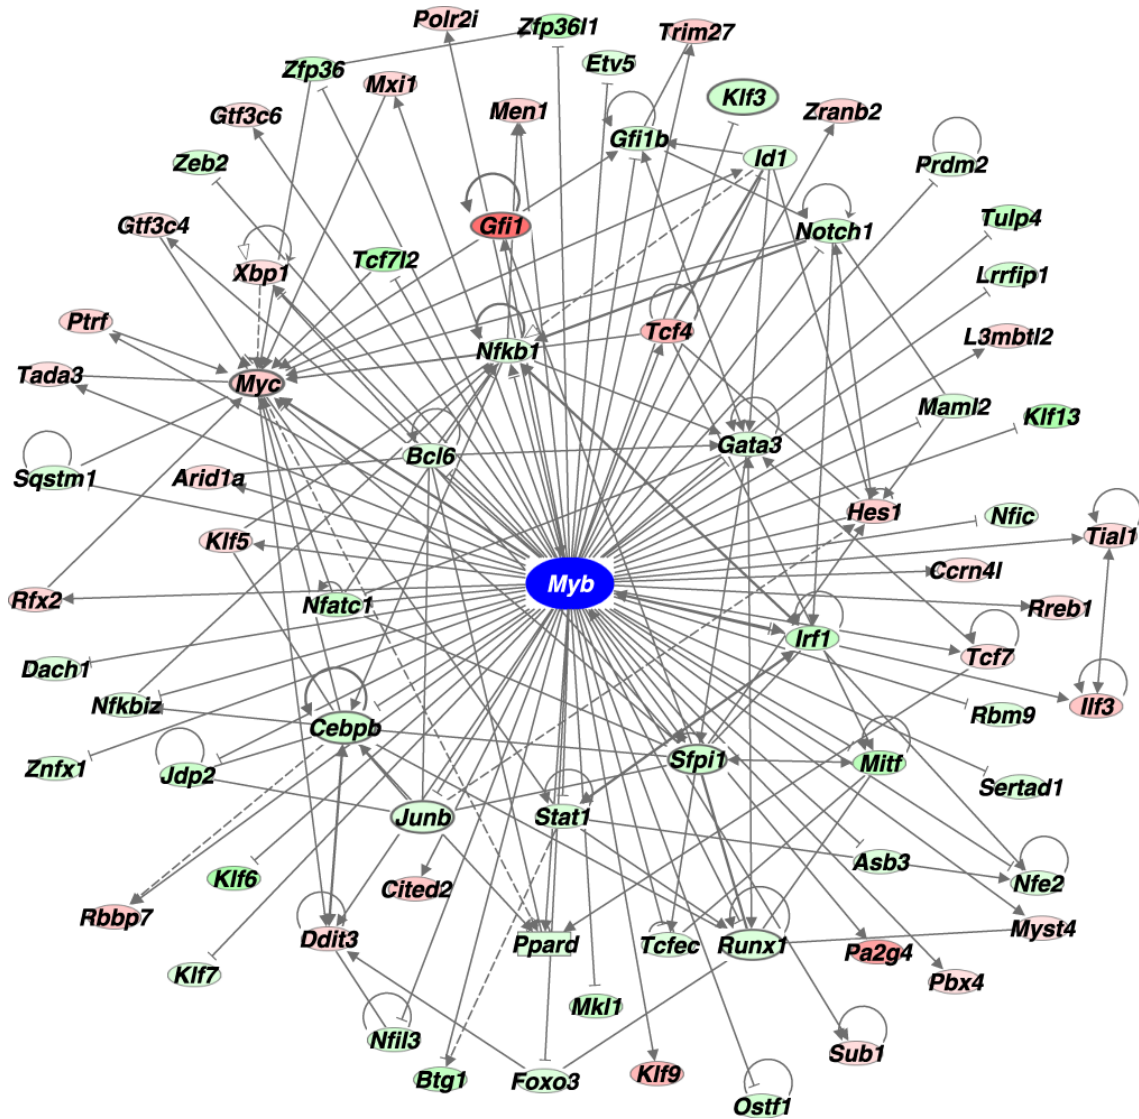

**Supplementary Figure S6. The Myb-centric regulatory network.**

The network was constructed with Myb and the 75 transcription regulators directly targeted by Myb using the IPA program. Inferred regulatory interactions among the 75 factors were extracted from the IPA knowledgebase and added to the network. Red hubs represent genes activated by Myb while green ones represent those repressed by Myb.

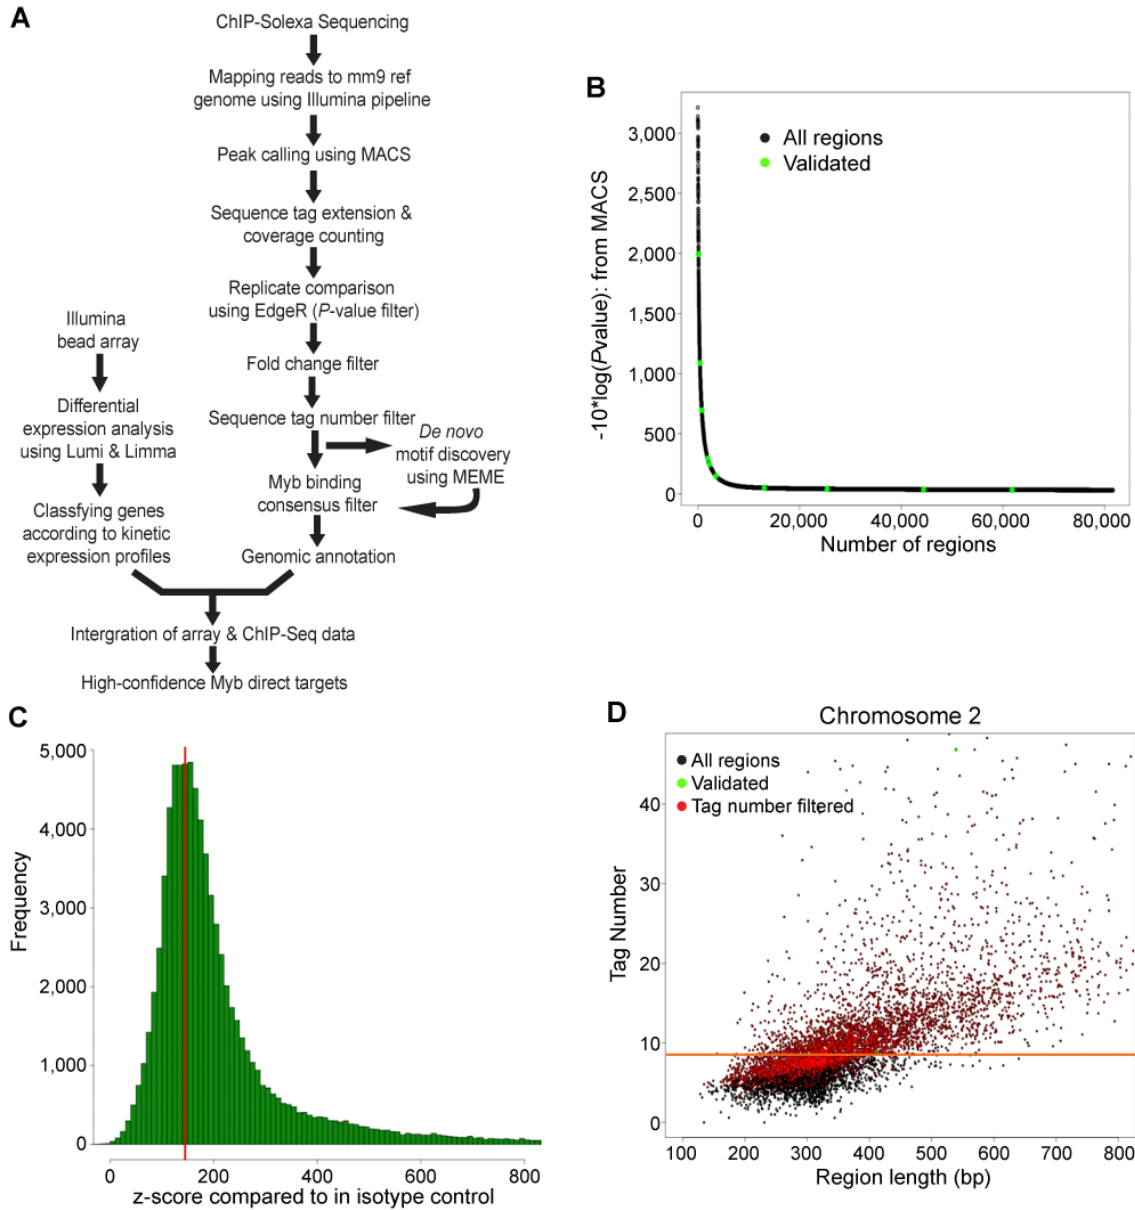

**Supplementary Figure S7. Analysis of expression profiling and ChIP-Seq data.**

(A) Flow chart summarizing the procedure of expression profiling and ChIP-Seq data analysis. (B) Distribution of MACS  $P$ -values for all possible MBRs identified (unfiltered). Highlighted regions indicate those that have been validated subsequently using independent ChIP-qPCR. (C) Z-score distribution of Myb-*activated* (B1T2+B2) set against isotype control for Chromosome 2. The vertical red line denotes the z-score threshold used, values above which survive the tag number filter. Distribution for other chromosomes is very similar. (D) Filtering of MBRs with tag number filter. The z-score threshold indicated in (C) was applied to the list of possible MBRs. The regions survived this threshold are highlighted in red. The horizontal orange line denotes a fixed threshold of 8.5 tags for comparison.



**Supplementary Table S1.** Identified Myb bound genes which have been reported as Myb target genes previously.

| Identified Myb Bound Genes | Regulation by Myb in ERMVYB cells | Regulation Reported in Literature | Discovery and Validation                                                                      | References |
|----------------------------|-----------------------------------|-----------------------------------|-----------------------------------------------------------------------------------------------|------------|
| <i>Act1</i>                | Not regulated                     | Activated                         | Gene repressed by DN Myb                                                                      | (1)        |
| <i>Ada</i>                 | Not expressed                     | Activated                         | ChIP, reporter studies                                                                        | (2,3)      |
| <i>Adora2b</i>             | Repressed                         | Activated                         | ChIP, reporter studies                                                                        | (4,5)      |
| <i>Bcl2</i>                | Activated                         | Activated                         | ChIP, reporter and expression studies, loss of expression in <i>Myb</i> <sup>KO</sup> tissues | (1,6-8)    |
| <i>Casp6</i>               | Not regulated                     | Activated                         | ChIP, expression studies                                                                      | (1)        |
| <i>Cbx4</i>                | Not expressed                     | Activated                         | ChIP, expression studies                                                                      | (1)        |
| <i>Cd34</i>                | Not expressed                     | Activated                         | Reporter and expression studies                                                               | (9)        |
| <i>Cdkn1a</i>              | Not regulated                     | Activated                         | Expression studies in <i>Myb</i> <sup>KD/KD</sup> mouse                                       | (10)       |
| <i>Cebpb (chicken)</i>     | Repressed                         | Activated (v-myb)                 | Reporter studies                                                                              | (11)       |
| <i>Colla2</i>              | Not expressed                     | Activated                         | Reporter and expression studies, <i>Myb</i> <sup>KO</sup> MEFs                                | (12,13)    |
| <i>Copa</i>                | Not regulated                     | Activated                         | ChIP, expression studies                                                                      | (1)        |
| <i>Cxcl12</i>              | Not expressed                     | Activated                         | ChIP, MYB KD in breast cancer cells (in breast cancer cells)                                  | (14)       |
| <i>Cxcr4</i>               | Activated                         | Activated                         | Expression studies                                                                            | (15,16)    |
| <i>Ela2</i>                | Activated                         | Activated                         | Expression and reporter studies                                                               | (17)       |
| <i>Ets2</i>                | Not regulated                     | Repressed (v-myb-ER)              | ChIP, RDA                                                                                     | (18)       |
| <i>Fabp5</i>               | Not regulated                     | Activated (v-myb specific)        | Expression studies                                                                            | (15)       |
| <i>Fli1</i>                | Not regulated                     | Repressed                         | Expression in <i>Myb</i> <sup>KD/KD</sup> CFU-E progenitors                                   | (19)       |
| <i>Flt3</i>                | Not expressed                     | Activated                         | Expression in Myb conditional KO or <i>Myb</i> <sup>KD/KD</sup> mouse                         | (10,16)    |
| <i>Gata2</i>               | Not expressed                     | Repressed                         | Expression in <i>Myb</i> <sup>KD/KD</sup> CFU-E progenitors                                   | (10,19)    |
| <i>Gata3</i>               | Repressed                         | Activated                         | ChIP, reporter and expression studies (in thymocytes)                                         | (20)       |
| <i>Gbx2 (chicken)</i>      | Not expressed                     | Activated                         | Reporter and expression studies, induced by MYB-ER in presence of cycloheximide               | (21)       |
| <i>Gfi1</i>                | Activated                         | Activated                         | Expression in conditional <i>Myb</i> <sup>KO</sup>                                            | (16)       |
| <i>Gstm1</i>               | Activated                         | Activated                         | Expression and reporter studies                                                               | (22)       |
| <i>Hspa8</i>               | Activated                         | Activated                         | ChIP, expression studies                                                                      | (1)        |
| <i>Igf1</i>                | Not expressed                     | Activated                         | Expression studies                                                                            | (23)       |
| <i>Igf1r</i>               | Activated                         | Activated                         | Expression studies                                                                            | (23)       |
| <i>Igfbp3</i>              | Not expressed                     | Repressed                         | Expression studies                                                                            | (23)       |
| <i>Ikzf1</i>               | Repressed                         | Activated                         | Expression studies in <i>Myb</i> <sup>KD/KD</sup> mouse                                       | (10)       |
| <i>Iqgap1</i>              | Not regulated                     | Activated                         | ChIP, expression studies                                                                      | (1)        |
| <i>Kit</i>                 | Not regulated                     | Activated                         | Expression and reporter studies                                                               | (24)       |
| <i>Mad111</i>              | Not regulated                     | Activated                         | ChIP, expression studies                                                                      | (1)        |
| <i>Mat2a</i>               | Activated                         | Activated                         | ChIP, reporter studies                                                                        | (2,25)     |
| <i>Mpo</i>                 | Activated                         | Activated                         | Expression and reporter studies, EMSA                                                         | (26,27)    |
| <i>Myc</i>                 | Activated                         | Activated                         | Reporter assays, ChIP                                                                         | (2,28-31)  |
| <i>Nr3c1</i>               | Not expressed                     | Activated                         | ChIP, expression studies                                                                      | (32)       |
| <i>Pdcd4</i>               | Activated                         | Activated                         | induced by MYB-ER in presence of cycloheximide                                                | (33,34)    |
| <i>Ppp3ca</i>              | Repressed                         | Activated                         | ChIP, expression studies                                                                      | (1)        |
| <i>Rag2</i>                | Not expressed                     | Activated                         | ChIP, reporter, DNase foot printing                                                           | (35,36)    |
| <i>Sfpi1</i>               | Repressed                         | Repressed                         | Expression in <i>Myb</i> <sup>KD/KD</sup> CFU-E progenitors                                   | (19)       |

|                               |               |           |                                                       |      |
|-------------------------------|---------------|-----------|-------------------------------------------------------|------|
| <i>Sp3</i>                    | Not expressed | Activated | ChIP, EMSA, reporter and expression studies           | (37) |
| <i>Spp1</i>                   | Not regulated | Activated | ChIP, EMSA and expression studies (in melanoma cells) | (38) |
| <i>Tcfec</i>                  | Repressed     | Activated | ChIP, expression studies                              | (1)  |
| <i>Yeats4 (chicken GAS41)</i> | Not regulated | Activated | ChIP, reporter studies                                | (39) |

**Supplementary Table S9.** Cross validation of identified Myb regulated genes in ERMYP cells.

GSEA showing that top 200 (by fold change from 0 to 24 h after  $\beta$ -E<sub>2</sub> withdrawal) activated/repressed genes identified in ERMYP cells were enriched either positively or negatively in the *MYB* knockdown THP-1 dataset, and *vice versa*. Similarly, examination of gene sets regulated by *Hoxa9/Meis1* revealed very significant overrepresentation in our Myb regulated genes identified in ERMYP cells.

THP-1 *MYB*<sup>KD</sup> array (ranked by Fold Change)

| Gene Set Name                       | NES   | FDR  |
|-------------------------------------|-------|------|
| ERMYP Top200 Myb activated (0-24 h) | 1.98  | 0.00 |
| ERMYP Top200 Myb repressed (0-24 h) | -2.72 | 0.00 |

ERMYP array (ranked by Fold Change)

| Gene Set Name              | NES   | FDR  |
|----------------------------|-------|------|
| THP-1 Top200 Myb-activated | 1.55  | 0.03 |
| THP-1 Top200 Myb-repressed | -2.32 | 0.00 |
| HOXA9_MEIS1_UP             | 2.43  | 0    |
| HOXA9_MEIS1_DN             | -2.61 | 0    |

NES: normalized enrichment score; FDR: false discovery rate

**Supplementary Table S10.** Primers used in ChIP-qPCR

| Mouse Chr. | MBR start coordinates | MBR end coordinates | Nearest Mouse Gene | Dist. to TSS (kb) | Primer sequence                                            | Remark                                       |
|------------|-----------------------|---------------------|--------------------|-------------------|------------------------------------------------------------|----------------------------------------------|
| 14         | 32594325              | 32595366            | <i>Ankrd28</i>     | 48.5              | CTAAACATTTGCTATACTGCCGCATACA<br>TCCACTAAAAGCCACAAGGAAATCTG |                                              |
| 1          | 108516809             | 108517185           | <i>Bcl2</i>        | 93.9              | ACCCCTCCACAGCCAGTGAGTA<br>TGTTCTGCCTGTGATGTGGTAAGAA        |                                              |
| 1          | 108414031             | 108414603           | <i>Bcl2</i>        | 196.5             | AGACGGAGGCAGAAATGAAATCCAT<br>TGCCAGCCCAGATAAGCAGCAGTGT     |                                              |
| 1          | 108412090             | 108412586           | <i>Bcl2</i>        | 198.5             | GGCCCAGAAGCCTGCCACAT<br>CCTCCCCACCTCAGTATCCAT              |                                              |
| 8          | 125224465             | 125224989           | <i>Chfa2t3</i>     | -1.8              | ACCCAGCGCAGAAAGCCACAA<br>CCCCAGGAGGGCAGTTGG                | MBR failed<br>EdgeR <i>P</i> value<br>filter |
| 8          | 97360448              | 97360694            | <i>Ciapin1</i>     | 1.7               | GGAGGAGCGTCTAACAACAAGGTCAGT<br>TCAGGGCTGTTTCACTAAAGAGGTG   |                                              |
| 10         | 17436371              | 17437038            | <i>Cited2</i>      | -6.5              | AACCGCAACTGTAAGCTGTAAGACC<br>GAGGCAGTTGCAGACATCTAAGTGGTT   |                                              |
| 8          | 97362054              | 97362940            | <i>Coq9</i>        | 0.45              | CGCTGGAGAAACCGACCGAACAG<br>TACGGGGCATATGGCAGCAAATGA        |                                              |
| 1          | 130511770             | 130512209           | <i>Cxcr4</i>       | -23.1             | TAAGGCATCTTCTGGGCACTCCATTT<br>GCATGAGGCCACCTAAAACCACAGT    |                                              |
| 5          | 108154811             | 108155282           | <i>Gfi1</i>        | -1.8              | CGGAAGTCTCCAGGAGCCAAGAATAC<br>CCCCAAAACCACAACTTCACTTCC     | MBR failed<br>EdgeR <i>P</i> value<br>filter |
| 11         | 87606781              | 87607312            | <i>Mpo</i>         | -0.32             | GCCCTGGGCTGCTTACCAACT<br>GCTGATTCGGAGCAGGCAGAGC            |                                              |
| 11         | 87602753              | 87604100            | <i>Mpo</i>         | -3.5              | ACCCCAACACCTCTAATTCCAAGTGA<br>CTTAGGGTTTAGCCAGCTTCCTGTG    |                                              |
| 10         | 128002941             | 128003659           | <i>Pa2g4</i>       | -0.22             | TGGCCCGCCCCTCGCTGTTA<br>GCCGGGCACGCTGGGAAGAGT              |                                              |
| 18         | 69577653              | 69578303            | <i>Tcf4</i>        | 72.6              | GAGATTGGCTCCCATGCCTACTGC<br>ATCATGTGCCGACTGTTAGCCATCC      |                                              |
| 2          | 167512894             | 167513412           | <i>Cebpb</i>       | -1.3              | GGGGCCAGGACCCAGGACT<br>CACTAACGGGCCCTCCCTTCTCC             | MBR failed<br>EdgeR <i>P</i> value<br>filter |
| 2          | 167535778             | 167536633           | <i>Cebpb</i>       | 21.9              | GGGTGGGCCAGCTTCTCCTT<br>AGGGCTGGATCCTGCCTGAACAC            |                                              |
| 2          | 152560723             | 152561093           | <i>Id1</i>         | -1.05             | AGCCCGTCCGGGTTTTATGAATGG<br>CTTCCCAGGGCTGGTCTGTGTGTCAG     | MBR failed<br>EdgeR <i>P</i> value<br>filter |
| 11         | 11629990              | 11631185            | <i>Ikzf1</i>       | 44.1              | CTTTGATTTAGTTGGGCTGGTGTCT<br>TTGGCTGTATGGTAAGAGCTTGTGAAGA  | MBR failed<br>EdgeR <i>P</i> value<br>filter |
| 3          | 89716607              | 89717320            | <i>Il6ra</i>       | -0.13             | GCGCCATCCTACTGGGCTTTCGTA<br>CCGGCCGTCCTGGCAACAGT           |                                              |
| 8          | 87501243              | 87501823            | <i>Jumb</i>        | 1.26              | GGCGCAGCTCAAGCAGAAGGTCA<br>CAAGGCTGGGGGTGTCGGTATGG         |                                              |
| 5          | 65144354              | 65144788            | <i>Klf3</i>        | -50.3             | GGGGCCGAGGCAGAAGTAAA<br>GATACCAGGGGCAGGAGAATGAC            |                                              |
| 13         | 5802800               | 5803791             | <i>Klf6</i>        | -57.7             | TCCTGGCTGGTGTGTTGGTATTCA<br>TAGCCAGGCACCTTCCAATCAGA        |                                              |
| 7          | 71056851              | 71057218            | <i>Klf13</i>       | 26.8              | CCTCAGGGCCACAGAGAACAACCT                                   |                                              |

|    |           |           |                  |        |                              |                    |
|----|-----------|-----------|------------------|--------|------------------------------|--------------------|
|    |           |           |                  |        | CCCCCTTCCCAGCAGCTATTCTTG     |                    |
| 16 | 92715586  | 92716047  | <i>Runx1</i>     | 110.4  | TCCCCGCCCCAGCGACAG           |                    |
|    |           |           |                  |        | TACAGCGGAGGTGTGCTCAATGTTGT   |                    |
| 2  | 90922859  | 90923397  | <i>Sfpil</i>     | -13.7  | CTGGTGGCAAGAGCGTTTC          | (40)               |
|    |           |           |                  |        | CAGCAAGGCCGGTGCCTG           |                    |
| 2  | 90936564  | 90936975  | <i>Sfpil</i>     | -0.13  | CAAGGCCTAGCGACCGGA           |                    |
|    |           |           |                  |        | TTGCATAAATCTCTTGCCTACA       |                    |
| 16 | 95660619  | 95661272  | <i>Erg</i>       | 91     | CTCCCTGCCAGATGGGTATCA        |                    |
|    |           |           |                  |        | AATGGCTGGGCAGAAATCAGTTGA     |                    |
| 1  | 139703264 | 139703893 | <i>Mir181a-1</i> | -159.5 | TGTTTCCCATCAGTGCCCAAG        |                    |
|    |           |           |                  |        | ATCAGTCTCACAGCCTAGGGAACAAAGA |                    |
|    |           |           | <i>B2m</i>       | TSS    | GCGCCCTGGCTGGCTCTC           | irrelevant control |
|    |           |           |                  |        | GATAGCATAACAGCCGGTCAGTGAG    |                    |
|    |           |           | <i>Hprt</i>      | TSS    | GGCCTGGGGCTGCGGTATGG         | irrelevant control |
|    |           |           |                  |        | CGCGCCACCAAAGGCAGTTCC        |                    |
|    |           |           | <i>Klf5</i>      | -0.7   | TTCCATGCTCGGGCTAGAATCAA      | irrelevant control |
|    |           |           |                  |        | TGGGCACATTTCCCTACAGTAT       |                    |
|    |           |           | <i>Krt7</i>      | TSS    | CCGCCCCGCATGGAGGAATAAAA      | irrelevant control |
|    |           |           |                  |        | CGCGCCCGGTAAGCAGTG           |                    |

| Human Gene Symbol | Dist. to human gene TSS (kb) | Primer sequence                                             | Remark |
|-------------------|------------------------------|-------------------------------------------------------------|--------|
| <i>ANKRD28</i>    | 61.3                         | GAGTCCATGTCAGGCATATTCTTACTG<br>CAAACGGCTTAACTGCTTTCGTGTG    |        |
| <i>BCL2</i>       | 219                          | AGTTGGCAGAGTGGTTTGTGTGC<br>GTCCCAGCCCGGCATCTGAG             |        |
| <i>CBFA2T3</i>    | -2.1                         | TTCCTCCCCAGCCCTTATCTCCT<br>ACCACTCCCCACCTCCCCACTACC         |        |
| <i>CXCR4</i>      | -18.6                        | TTTTTGCTCTGTAAACAGCCATCTCT<br>ACCACAGTGGGGTGTAGGTAATCTG     |        |
| <i>GF11</i>       | 0.7                          | ACGGGGGTTGGGAGCAGGTCTG<br>GGCACCGCGCTAGGAGAGTTTCA           |        |
| <i>MPO</i>        | -1                           | AACTGATCACTAACCACAACCAGTTC<br>GAGACCGTTGGGCTTACA            |        |
| <i>MPO</i>        | -4                           | AGCCGCTGCCTCTGCCATCT<br>ACTGCCGTCTTCTGCCACTTA               |        |
| <i>PA2G4</i>      | TSS                          | TCGCTCAGCGTTCTCGGTGGAAGT<br>CGGAATCGCCGGGCACTCTG            |        |
| <i>TCF4</i>       | 79.7                         | CAGGAGTCTTGCTATGATTTTGAGAGG<br>AACC GCAATACAGCTAAATGCTACAAG |        |
| <i>ID1</i>        | -2.1                         | CGCGGCCAGCCTGACA<br>CCCTTCCCGGGCCGGTCTGTG                   |        |
| <i>IKZF1</i>      | 77                           | TGCGCACGCACTCTGCTAAGC<br>GAAGCCCGCGGAGATACCA                |        |
| <i>IL6R</i>       | TSS                          | GCCGGTGC GCGGGGCTGTT<br>GGGCCGTCCAGGGTGC GTTAC              |        |
| <i>JUNB</i>       | 1.3                          | GGTGGCCAGCTCAAACAGAAGGT                                     |        |

---

|                 |        |                               |                    |
|-----------------|--------|-------------------------------|--------------------|
|                 |        | TAAAGGGGCAGGGGACGTTTCAGAA     |                    |
| <i>KLF3</i>     | -42.8  | AGGCCAGTATTATAGGGACACCTGTG    |                    |
|                 |        | GGCGGCAATAAGGCTGAAGTC         |                    |
| <i>KLF6</i>     | -67.3  | TTCAGTAGGCAGAGAACACATTTTGT    |                    |
|                 |        | CAGGCGCTTTTCCAATCAGAGT        |                    |
| <i>KLF13</i>    | 26.7   | TCGGGGCTGCAGAGAACAA           |                    |
|                 |        | GGGGAGGATAAGAGTGGAAATGAT      |                    |
| <i>RUNX1</i>    | 140.8  | ATATTTGCTATCCCAGCCCTTGGTGA    |                    |
|                 |        | GTGCAAAATGCCTCGGGGAAAAA       |                    |
| <i>SPI1</i>     | -16.5  | GCACACATGCTTCTGTGGTGACT       | (41)               |
|                 |        | CCACGTGCCCTGACTCCCCTCCTAGC    |                    |
| <i>SPI1</i>     | TSS    | CTTCCCAGGCCAGCCCTTTGAGC       |                    |
|                 |        | GGGCCTGCCGCTGGGAGATAGTC       |                    |
| <i>ERG</i>      | 185.2  | TGGGTTATCAGGGCTGAACACTCG      |                    |
|                 |        | TAACGGCTGATGACGGCTCCAATG      |                    |
| <i>MIR181A1</i> | -182.5 | AGCAGCTTTCCTTAACGAC           |                    |
|                 |        | TGAACAGCCCAGTGAACAAGTAT       |                    |
| <i>KLF5</i>     | -1     | CCGTCCTCCAATAAGCCAGATAA       | irrelevant control |
|                 |        | GCCGCAAACATAGACACAGAGCAG      |                    |
| <i>TFF1</i>     | TSS    | GGCCATCTCTCACTATGAATCACTTCTGC | irrelevant control |
|                 |        | GGCAGGCTCTGTTTGTCTAAAGAGCG    |                    |
| <i>TUBB</i>     | -1.6   | CGCCCGGCCTATTTTATCTCACAA      | irrelevant control |
|                 |        | GCAGGGCTCCAGCTCCTCGTT         |                    |

---

TSS: transcriptional start site

## Supplementary References

1. Lang, G., White, J.R., Argent-Katwala, M.J., Allinson, C.G. and Weston, K. (2005) Myb proteins regulate the expression of diverse target genes. *Oncogene*, **24**, 1375-1384.
2. Berge, T., Matre, V., Brendeford, E., Saether, T., Lüscher, B. and Gabrielsen, O. (2007) Revisiting a selection of target genes for the hematopoietic transcription factor c-Myb using chromatin immunoprecipitation and c-Myb knockdown. *Blood Cells Mol. Dis.*, **39**, 278-286.
3. Ess, K., Whitaker, T., Cost, G., Witte, D., Hutton, J. and Aronow, B. (1995) A central role for a single c-Myb binding site in a thymic locus control region. *Mol. Cell. Biol.*, **15**, 5707-5715.
4. Worpenberg, S., Burk, O. and Klempnauer, K. (1997) The chicken adenosine receptor 2B gene is regulated by v-myb. *Oncogene*, **15**, 213-221.
5. Gundelach, H., Braas, D. and Klempnauer, K.-H. (2007) The promoter regions of the Myb-regulated Adora2B and Mcm4 genes co-localize with origins of DNA replication. *BMC Mol. Biol.*, **8**, 75.
6. Salomoni, P., Perrotti, D., Martinez, R., Franceschi, C. and Calabretta, B. (1997) Resistance to apoptosis in CTLL-2 cells constitutively expressing c-Myb is associated with induction of BCL-2 expression and Myb-dependent regulation of bcl -2 promoter activity. *Proc. Natl. Acad. Sci. U. S. A.*, **94**, 3296-3301.
7. Taylor, D., Badiani, P. and Weston, K. (1996) A dominant interfering Myb mutant causes apoptosis in T cells. *Genes Dev.*, **10**, 2732-2744.
8. Zorbas, M., Sicurella, C., Bertoncetto, I., Venter, D., Ellis, S., Mucenski, M. and Ramsay, R. (1999) c-Myb is critical for murine colon development. *Oncogene*, **18**, 5821-5830.
9. Melotti, P., Ku, D. and Calabretta, B. (1994) Regulation of the expression of the hematopoietic stem cell antigen CD34: role of c-myb. *J. Exp. Med.*, **179**, 1023-1028.
10. Garcia, P., Clarke, M., Vegiopoulos, A., Berlanga, O., Camelo, A., Lorvellec, M. and Frampton, J. (2009) Reduced c-Myb activity compromises HSCs and leads to a myeloproliferation with a novel stem cell basis. *EMBO J.*, **28**, 1492-1504.
11. Mink, S., Jaswal, S., Burk, O. and Klempnauer, K.-H. (1999) The v-Myb oncoprotein activates C/EBP[beta] expression by stimulating an autoregulatory loop at the C/EBP[beta] promoter. *Biochim. Biophys. Acta, Gene Struct. Expression*, **1447**, 175-184.
12. Kopecki, Z., Luchetti, M., Adams, D., Strudwick, X., Mantamadiotis, T., Stoppacciaro, A., Gabrielli, A., Ramsay, R. and Cowin, A. (2007) Collagen loss and impaired wound healing is associated with c-Myb deficiency. *J. Pathol.*, **211**, 351-361.
13. Luchetti, M., Paroncini, P., Majlingová, P., Frampton, J., Mucenski, M., Baroni, S., Sambo, P., Golay, J., Introna, M. and Gabrielli, A. (2003) Characterization of the c-Myb-responsive region and regulation of the human type I collagen alpha 2 chain gene by c-Myb. *J. Biol. Chem.*, **278**, 1533-1541.
14. Chen, L., Xu, S., Zeng, X., Li, J., Yin, W., Chen, Y., Shao, Z. and Jin, W. (2010) c-myb activates CXCL12 transcription in T47D and MCF7 breast cancer cells. *Acta Biochim. Biophys. Sin. (Shanghai)*, **42**, 1-7.
15. Liu, F., Lei, W., O'Rourke J, P. and Ness, S.A. (2006) Oncogenic mutations cause dramatic, qualitative changes in the transcriptional activity of c-Myb. *Oncogene*, **25**, 795-805.
16. Lieu, Y.K. and Reddy, E.P. (2009) Conditional c-myb knockout in adult hematopoietic stem cells leads to loss of self-renewal due to impaired proliferation and accelerated differentiation. *Proc. Natl. Acad. Sci. U. S. A.*, **106**, 21689-21694.
17. Oelgeschlager, M., Nuchprayoon, I., Luscher, B. and Friedman, A.D. (1996) C/EBP, c-Myb, and PU.1 cooperate to regulate the neutrophil elastase promoter. *Mol. Cell. Biol.*, **16**, 4717-4725.
18. Wang, D.M., Sevcikova, S., Wen, H., Roberts, S. and Lipsick, J.S. (2007) v-Myb represses the transcription of Ets-2. *Oncogene*, **26**, 1238-1244.
19. Vegiopoulos, A., Garcia, P., Emambokus, N. and Frampton, J. (2006) Coordination of erythropoiesis by the transcription factor c-Myb. *Blood*, **107**, 4703-4710.

20. Maurice, D., Hooper, J., Lang, G. and Weston, K. (2007) c-Myb regulates lineage choice in developing thymocytes via its target gene Gata3. *EMBO J.*, **26**, 3629-3640.
21. Kowenz-Leutz, E., Herr, P., Niss, K. and Leutz, A. (1997) The homeobox gene GBX2, a target of the myb oncogene, mediates autocrine growth and monocyte differentiation. *Cell*, **91**, 185-195.
22. Bartley, P.A., Keough, R.A., Lutwyche, J.K. and Gonda, T.J. (2003) Regulation of the gene encoding glutathione S-transferase M1 (GSTM1) by the Myb oncoprotein. *Oncogene*, **22**, 7570-7575.
23. Kim, M.S., Kim, S.Y., Arunachalam, S., Hwang, P.H., Yi, H.K., Nam, S.Y. and Lee, D.Y. (2009) c-myb stimulates cell growth by regulation of insulin-like growth factor (IGF) and IGF-binding protein-3 in K562 leukemia cells. *Biochem. Biophys. Res. Commun.*, **385**, 38-43.
24. Ratajczak, M.Z., Perrotti, D., Melotti, P., Powzaniuk, M., Calabretta, B., Onodera, K., Kregenow, D.A., Machalinski, B. and Gewirtz, A.M. (1998) Myb and Ets Proteins Are Candidate Regulators of c-kit Expression in Human Hematopoietic Cells. *Blood*, **91**, 1934-1946.
25. Zeng, Z., Yang, H., Huang, Z.Z., Chen, C., Wang, J. and Lu, S.C. (2001) The role of c-Myb in the up-regulation of methionine adenosyltransferase 2A expression in activated Jurkat cells. *Biochem. J.*, **353**, 163-168.
26. Bartley, P.A., Lutwyche, J.K. and Gonda, T.J. (2001) Identification and validation of candidate Myb target genes. *Blood Cells Mol. Dis.*, **27**, 409-415.
27. Britos-Bray, M. and Friedman, A.D. (1997) Core binding factor cannot synergistically activate the myeloperoxidase proximal enhancer in immature myeloid cells without c-Myb. *Mol. Cell. Biol.*, **17**, 5127-5135.
28. Nakagoshi, H., Kanei-Ishii, C., Sawazaki, T., Mizuguchi, G. and Ishii, S. (1992) Transcriptional activation of the c-myc gene by the c-myb and B-myb gene products. *Oncogene*, **7**, 1233-1240.
29. Schmidt, M., Nazarov, V., Stevens, L., Watson, R. and Wolff, L. (2000) Regulation of the Resident Chromosomal Copy of c-myc by c-Myb Is Involved in Myeloid Leukemogenesis. *Mol. Cell. Biol.*, **20**, 1970-1981.
30. Zobel, A., Kalkbrenner, F., Guehmann, S., Nawrath, M., Vorbrueggen, G. and Moelling, K. (1991) Interaction of the v-and c-Myb proteins with regulatory sequences of the human c-myc gene. *Oncogene*, **6**, 1397-1407.
31. Evans, J.L., Moore, T.L., Kuehl, W.M., Bender, T. and Ting, J.P. (1990) Functional analysis of c-Myb protein in T-lymphocytic cell lines shows that it trans-activates the c-myc promoter. *Mol. Cell. Biol.*, **10**, 5747-5752.
32. Geng, C.-d. and Vedeckis, W.V. (2005) c-Myb and Members of the c-Ets Family of Transcription Factors Act as Molecular Switches to Mediate Opposite Steroid Regulation of the Human Glucocorticoid Receptor 1A Promoter. *J. Biol. Chem.*, **280**, 43264-43271.
33. Schlichter, U., Burk, O., Worpenberg, S. and Klempnauer, K.H. (2001) The chicken Pcd4 gene is regulated by v-Myb. *Oncogene*, **20**, 231-239.
34. Schlichter, U., Kattmann, D., Appl, H., Miethe, J., Brehmer-Fastnacht, A. and Klempnauer, K.H. (2001) Identification of the myb-inducible promoter of the chicken Pcd4 gene. *Biochim. Biophys. Acta*, **1520**, 99-104.
35. Kishi, H., Jin, Z.-X., Wei, X.-C., Nagata, T., Matsuda, T., Saito, S. and Muraguchi, A. (2002) Cooperative binding of c-Myb and Pax-5 activates the RAG-2 promoter in immature B cells. *Blood*, **99**, 576-583.
36. Wang, Q.F., Lauring, J. and Schlissel, M.S. (2000) c-Myb binds to a sequence in the proximal region of the RAG-2 promoter and is essential for promoter activity in T-lineage cells. *Mol. Cell. Biol.*, **20**, 9203-9211.

37. Tapias, A., Ciudad, C.J. and Noe, V. (2008) Transcriptional regulation of the 5'-flanking region of the human transcription factor Sp3 gene by NF-1, c-Myb, B-Myb, AP-1 and E2F. *Biochim. Biophys. Acta*, **1779**, 318-329.
38. Schultz, J., Lorenz, P., Ibrahim, S.M., Kundt, G., Gross, G. and Kunz, M. (2009) The functional -443T/C osteopontin promoter polymorphism influences osteopontin gene expression in melanoma cells via binding of c-Myb transcription factor. *Mol. Carcinog.*, **48**, 14-23.
39. Braas, D., Gundelach, H. and Klempnauer, K.-H. (2004) The glioma-amplified sequence 41 gene (GAS41) is a direct Myb target gene. *Nucleic Acids Res.*, **32**, 4750-4757.
40. Yeaman, C., Wang, D., Paz-Priel, I., Torbett, B.E., Tenen, D.G. and Friedman, A.D. (2007) C/EBP $\alpha$  binds and activates the PU.1 distal enhancer to induce monocyte lineage commitment. *Blood*, **110**, 3136-3142.
41. Okuno, Y., Huang, G., Rosenbauer, F., Evans, E.K., Radomska, H.S., Iwasaki, H., Akashi, K., Moreau-Gachelin, F., Li, Y., Zhang, P. *et al.* (2005) Potential Autoregulation of Transcription Factor PU.1 by an Upstream Regulatory Element. *Mol. Cell. Biol.*, **25**, 2832-2845.
